# Supplementary material
Source: PubMed Central journal article supplement (PMC4079726)
Supplement: NIHMS592030-supplement-1.pdf [file NIHMS592030-supplement-1.pdf]

**Supplementary Table. Patient Information for Isolation of Lin<sup>-</sup>CD24<sup>-</sup>CD44<sup>+</sup> Cells from Human Breast Cancer**

| Case No. | Age | Tumor size (cm) | ER  | PR  | HER | Grade | Lymph node | Stage | Lin <sup>-</sup> CD24 <sup>-</sup> CD44 <sup>+</sup> |
|----------|-----|-----------------|-----|-----|-----|-------|------------|-------|------------------------------------------------------|
| 1        | 35  | 3.8×3.0         | (+) | (+) | (-) | III   | N1         | II    | 1.4%                                                 |
| 2        | 44  | 3.6 ×2.8        | (+) | (-) | (+) | II    | N2         | III   | 33.6%                                                |
| 3        | 40  | 4.5 ×2.6        | (-) | (-) | (-) | III   | N2         | III   | 14.0%                                                |
| 4        | 48  | 3.3 ×2.5        | (-) | (-) | (+) | III   | N1         | II    | 5.2%                                                 |
| 5        | 42  | 3.6 ×2.8        | (+) | (+) | (-) | III   | N2         | III   | 4.6%                                                 |
| 6        | 45  | 4.3 ×2.9        | (+) | (-) | (-) | III   | N2         | III   | 2.1%                                                 |
| 7        | 45  | 3.0 ×1.8        | (+) | (-) | (-) | II    | N1         | II    | 2.0%                                                 |
| 8        | 40  | 3.9 ×2.5        | (-) | (-) | (-) | III   | N1         | II    | 25.5%                                                |

Notes: All eight patients were diagnosed as invasive ductal breast cancer. The tumor size is the original tumor size measured after surgery. ER, Estrogen receptor; PR, progesteron receptor; HER2, Human Epidermal Growth Factor Receptor 2. The hormonal receptor status was determined by the immunohistochemistry, which were done on the paraffin-embedded sections of the primary tumors. The lymph node information is according to the breast cancer TNM staging system. The Lin<sup>-</sup>CD24<sup>-</sup>CD44<sup>+</sup> cells were isolated for primary breast tumors.
